# Supplementary material
Source: publisher figshare collection journal article supplement (https://acs.figshare.com/ndownloader/files/20179634)
Supplement: Supplementary file 1 [file 20179634]

Compound,SMILE,SSAT (pmol/min/mg),SMOX (pmol/min/mg),SSAO (pmol/min/mg),APAO (pmol/min/mg),DU145 ODC activity 6h (fold),DU145 ODC activity 3d (fold),DU145 AdoMetDC activity 6h (fold),DU145 AdoMetDC activity 3d (fold),DU145 SSAT activity 6h (fold),DU145 SSAT activity 3d (fold),DU145 SMOX activity 6h (fold),DU145 SMOX activity 3d (fold),"DU145 cell growth 1d, w/o AG (%)","DU145 cell growth 1d, w AG (%)","DU145 cell growth 3d, w/o DFMO (%)","DU145 cell growth 3d, w DFMO (%)",DU145 analog uptake w/o CHX (pmol/mgDNA),DU145 analog uptake w CHX (pmol/mgDNA),"14C-Spm uptake (%), 1 mM competitor","14C-Spm uptake (%), 10 mM competitor","14C-Spm uptake (%), 100 mM competitor",ODC activity after 6h (0.1 mM) (fold),ODC activity after 6h (10 mM) (fold),ODC activity after 6h (25 mM) (fold),ODC activity after 6h (50 mM) (fold),ODC activity after 6h (100 mM) (fold),,,,,,,,,,
none,-,-,-,-,-,"1,00 ± 0,09","1,00 ±  0,028","1,00 ± 0,05","1,00 ± 0,05","1,00 ± 0,04","1,00 ± 0,04","1,00 ± 0,02","1,00 ± 0,02",100 ± 3,100 ± 2,100 ± 5,71 ± 1,-,-,100 ± 4,100 ± 4,100 ± 4,"1,00 ± 0,04","1,00 ± 0,04","1,00 ± 0,04","1,00 ± 0,04","1,00 ± 0,04",,,,,,,,,,
1,NCCCNCCCCNCCCN,2314 ± 19,1557 ± 2,786 ± 62,157 ± 3,-,-,-,-,-,-,-,-,2 ± 0,98 ± 1,96 ± 2,107 ± 4,-,-,82 ± 3,60 ± 1,22 ± 0,"0,68 ± 0,04","0,24 ± 0,02","0,22 ± 0,02","0,20 ± 0,04","0,16 ± 0,01",,,,,,,,,,
2,NC(C)CCNCCCCNC(C)CCN,12 ± 1,247 ± 4,ND,465 ± 3,"0,18 ± 0,03","0,33 ±  0,03","0,46 ± 0,04","0,38 ± 0,04","1,00 ± 0,08","1,30 ± 0,05","1,05 ± 0,08","1,12 ± 0,01",94 ± 3,96 ± 2,99 ± 1,105 ± 5,172 ± 49,354 ± 23,83 ± 5,55 ± 3,22 ± 1,"0,80 ± 0,05","0,28 ± 0,05","0,25 ± 0,03","0,20 ± 0,03","0,18 ± 0,03",,,,,,,,,,
3,NCC(C)CNCCCCNCC(C)CN,401 ± 18,119 ± 2,133 ± 6,199 ± 3,"0,09 ± 0,02","0,22 ± 0,02","0,52 ± 0,05 ","0,83 ± 0,12","0,97 ± 0,09","1,18 ± 0,03","1 ± 0,03","0,87 ± 0,02",80 ± 2,77 ± 6,92 ± 3,96 ± 3,100 ± 9,181 ± 15,84 ± 6,80 ± 3,46 ± 1,"0,68 ± 0,04","0,19 ± 0,02","0,18 ± 0,03","0,17 ± 0,02","0,09 ± 0,02",,,,,,,,,,
4,NCC(C)(C)CNCCCCNCCCN,168 ± 8,39 ± 2,325 ± 21,37 ± 1,"0,57 ± 0,07","0,88 ± 0,06","0,84 ± 0,07","0,63 ± 0,12","0,86 ± 0,06","1,04 ± 0,04","0,94 ± 0,03","0,95 ± 0,04",85 ± 4,93+5,105 ± 5,103 ± 2,50 ± 4,54 ± 10,93 ± 1,89 ± 5,58 ± 3,"1,00 ± 0,03","0,90 ± 0,07","0,67 ± 0,1","0,57 ± 0,07","0,43 ± 0,01",,,,,,,,,,
5,NCCC(C)NCCCCNC(C)CCN,-,-,-,-,-,-,-,-,-,-,-,-,-,-,-,-,-,-,-,-,-,-,-,-,-,-,,,,,,,,,,
6,NCC(C)CNCCCCNCCCN,-,-,-,-,-,-,-,-,-,-,-,-,-,-,-,-,-,-,-,-,-,-,-,-,-,-,,,,,,,,,,
